# Supplementary material for: Prognostic Value of B7H4 Expression in Patients with Solid Cancers: A Systematic Review and Meta-Analysis
Source: MDPI journal article supplement (doi:10.3390/ijms25095045), 2024-05-06
Supplement: s1 [file s1]

**Table S1.** Search strategy. Literature retrieval strategy(Pubmed)

|    |                                                                        |
|----|------------------------------------------------------------------------|
| 1  | VTCN1 [Title/Abstract]                                                 |
| 2  | B7H4 [Title/Abstract]                                                  |
| 3  | V-Set Domain-Containing T-Cell Activation Inhibitor 1 [Title/Abstract] |
| 4  | B7x [Title/Abstract]                                                   |
| 5  | B7-H4 [Title/Abstract]                                                 |
| 6  | 1 OR 2 OR 3 OR 4 OR 5                                                  |
| 7  | Carcinoma [Title/Abstract]                                             |
| 8  | Carcinoma[MeSH]                                                        |
| 9  | Neoplasms[Title/Abstract]                                              |
| 10 | Neoplasms[MeSH]                                                        |
| 11 | cancer [Title/Abstract]                                                |
| 12 | neoplasia [Title/Abstract]                                             |
| 13 | Tumor [Title/Abstract]                                                 |
| 14 | malignancy [Title/Abstract]                                            |
| 15 | malignant neoplasm (Full text)                                         |
| 16 | 7 OR 8 OR 9 OR 10 OR 11 OR 12 OR 13 OR 14 OR 15                        |
| 17 | Prognosis [MeSH]                                                       |
| 18 | Prognosis [Title/Abstract]                                             |
| 19 | Survival Analysis [MeSH]                                               |
| 20 | Survival Analysis [Title/Abstract]                                     |
| 21 | Prognostic [Title/Abstract]                                            |
| 22 | Treatment Outcome [MeSH]                                               |
| 23 | Treatment Outcome [Title/Abstract]                                     |
| 24 | Fatal Outcome [MeSH]                                                   |
| 25 | Fatal Outcome [Title/Abstract]                                         |
| 26 | Mortality [MeSH]                                                       |
| 27 | Mortality [Title/Abstract]                                             |
| 28 | 17 OR 18 OR 19 OR 20 OR 21 OR 22 OR 23 OR 24 OR 25 OR 26 OR 27         |
| 29 | 6 AND 16 AND 28                                                        |

**Table S2.** Search strategy. Literature retrieval strategy(Embase)

|    |                                                                        |
|----|------------------------------------------------------------------------|
| 1  | VTCN1 [Title/Abstract]                                                 |
| 2  | B7H4 [Title/Abstract]                                                  |
| 3  | V-Set Domain-Containing T-Cell Activation Inhibitor 1 [Title/Abstract] |
| 4  | B7x [Title/Abstract]                                                   |
| 5  | B7-H4 [Title/Abstract]                                                 |
| 6  | 1 OR 2 OR 3 OR 4 OR 5                                                  |
| 7  | Carcinoma [Title/Abstract]                                             |
| 8  | Neoplasms[Title/Abstract]                                              |
| 9  | cancer [Title/Abstract]                                                |
| 10 | neoplasia [Title/Abstract]                                             |
| 11 | Tumor [Title/Abstract]                                                 |

|    |                                     |
|----|-------------------------------------|
| 12 | malignancy [Title/Abstract]         |
| 13 | malignant neoplasm [Title/Abstract] |
| 14 | 7 OR 8 OR 9 OR 10 OR 11 OR 12 OR 13 |
| 15 | Prognosis* [Title/Abstract]         |
| 16 | Survival Analysis [Title/Abstract]  |
| 17 | Treatment Outcome [Title/Abstract]  |
| 18 | Fatal Outcome [Title/Abstract]      |
| 19 | Mortality [Title/Abstract]          |
| 20 | 15 OR 16 OR 17 OR 18 OR 19          |
| 21 | 6 AND 14 AND 20                     |

**Table S3.** Search strategy. Literature retrieval strategy (Cochrane library)

|    |                                                                                |
|----|--------------------------------------------------------------------------------|
| 1  | VTCN1 [Title Abstract Keyword]                                                 |
| 2  | V-Set Domain-Containing T-Cell Activation Inhibitor 1 [Title Abstract Keyword] |
| 3  | B7H4 [Title Abstract Keyword]                                                  |
| 4  | B7x [Title Abstract Keyword]                                                   |
| 5  | B7-H4 [Title Abstract Keyword]                                                 |
| 6  | 1 OR 2 OR 3 OR 4 OR 5                                                          |
| 7  | Carcinoma [Title Abstract Keyword]                                             |
| 8  | Neoplasms[Title Abstract Keyword]                                              |
| 9  | cancer [Title Abstract Keyword]                                                |
| 10 | neoplasia [Title Abstract Keyword]                                             |
| 11 | Tumor [Title Abstract Keyword]                                                 |
| 12 | malignancy [Title Abstract Keyword]                                            |
| 13 | malignant neoplasm [Title Abstract Keyword]                                    |
| 14 | 7 OR 8 OR 9 OR 10 OR 11 OR 12 OR 13                                            |
| 15 | Prognosis* [Title Abstract Keyword]                                            |
| 16 | Survival Analysis [Title Abstract Keyword]                                     |
| 17 | Treatment Outcome [Title Abstract Keyword]                                     |
| 18 | Fatal Outcome [Title Abstract Keyword]                                         |
| 19 | Mortality [Title Abstract Keyword]                                             |
| 20 | 15 OR 16 OR 17 OR 18 OR 19                                                     |
| 21 | 6 AND 14 AND 20                                                                |

**Table S4.**

| Study                        | Selection                                |                                    |                           | Comparability                                                            |                                                                 | Exposure              |                                                 | Scores                           |   |
|------------------------------|------------------------------------------|------------------------------------|---------------------------|--------------------------------------------------------------------------|-----------------------------------------------------------------|-----------------------|-------------------------------------------------|----------------------------------|---|
|                              | Representativeness of the exposed cohort | Selection of the nonexposed cohort | Ascertainment of exposure | Demonstration that outcome of interest was not present at start of study | Comparability of cohorts on the basis of the design or analysis | Assessment of outcome | Was follow-up long enough for outcomes to occur | Adequacy of follow up of cohorts |   |
| 1 Feng Y <i>et al</i> , 2021 | «                                        | «                                  | «                         | -                                                                        | ««                                                              | «                     | «                                               | «                                | 8 |

|    |                                         |   |   |   |   |    |   |   |   |   |
|----|-----------------------------------------|---|---|---|---|----|---|---|---|---|
| 2  | Arigami T<br><i>et al</i> , 2011        | « | « | « | - | «« | - | « | « | 7 |
| 3  | Ding S <i>et al</i> ,<br>2021           | « | « | « | - | «  | - | « | « | 6 |
| 4  | Chen L <i>et al</i> , 2011              | « | « | « | - | «« | - | « | « | 7 |
| 5  | Xie N <i>et al</i> ,<br>2017            | « | « | « | - | «« | - | « | « | 7 |
| 6  | Wu L <i>et al</i> ,<br>2016             | « | « | « | - | «  | - | - | « | 5 |
| 7  | Dong Q <i>et al</i> , 2015              | « | « | « | - | «« | - | « | « | 7 |
| 8  | Zong L <i>et al</i> , 2020              | « | « | « | - | «  | « | « | « | 7 |
| 9  | Liang L <i>et al</i> , 2016             | « | « | « | - | «  | « | « | « | 7 |
| 10 | Fan M <i>et al</i> ,<br>2014            | « | « | « | - | «« | - | - | « | 6 |
| 11 | Wang L <i>et al</i> , 2018              | « | « | « | - | «« | - | « | « | 7 |
| 12 | Li H <i>et al</i> ,<br>2020             | « | « | « | - | «« | - | - | « | 6 |
| 13 | Liang M <i>et al</i> , 2014             | « | « | « | - | «  | « | « | « | 7 |
| 14 | Piao L <i>et al</i> ,<br>2018           | « | « | « | - | «« | « | « | « | 8 |
| 15 | Parra ER <i>et al</i> , 2018            | « | « | « | - | «  | - | « | « | 6 |
| 16 | Parra ER <i>et al</i> , 2019            | « | « | « | - | «  | - | « | « | 6 |
| 17 | Xu H <i>et al</i> ,<br>2016             | « | « | « | - | «« | - | « | « | 7 |
| 18 | Genova C<br><i>et al</i> , 2019         | « | « | « | - | «« | « | « | « | 8 |
| 19 | Genova C<br><i>et al</i> , 2020         | « | « | « | - | «« | « | « | « | 8 |
| 20 | Tsiaousidou<br>A <i>et al</i> ,<br>2016 | « | « | « | - | «« | - | « | « | 7 |
| 21 | Zhao X <i>et al</i> , 2016              | « | « | « | - | «« | « | « | « | 8 |
| 22 | Yan X <i>et al</i> ,<br>2022            | « | « | « | - | «« | - | « | « | 7 |
| 23 | Cao H <i>et al</i> ,<br>2019            | « | « | « | - | «« | - | « | « | 7 |
| 24 | Zang X,<br>2007                         | « | « | « | - | «  | « | « | « | 7 |
| 25 | Zong L <i>et al</i> , 2022              | « | « | « | - | «  | « | « | « | 7 |
| 26 | Zong L <i>et al</i> , 2023              | « | « | « | - | «« | « | « | « | 8 |
| 27 | Jikuya R <i>et al</i> , 2020            | « | « | « | - | «« | « | « | « | 8 |
| 28 | Jikuya R <i>et al</i> , 2021            | « | « | « | - | «« | « | « | « | 8 |
| 29 | Geng Y <i>et al</i> , 2015              | « | « | « | - | «« | - | « | « | 7 |
| 30 | Loch F N <i>et al</i> , 2023            | « | « | « | - | «  | - | « | « | 6 |
| 31 | Borgmann<br>M <i>et al</i> ,<br>2022    | « | « | « | - | «  | - | « | « | 6 |

**Figure S1.**

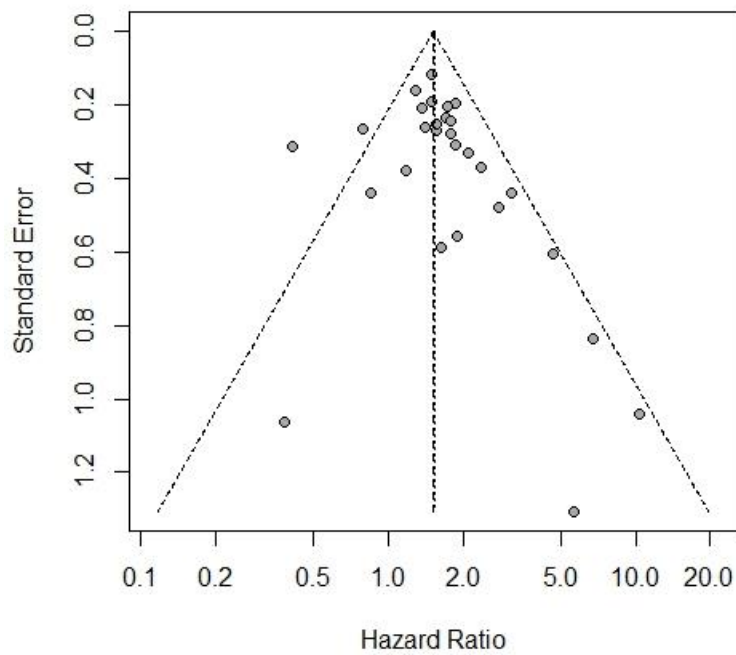

**Figure S1.** Begg's funnel plots for assessing potential publication bias on the relationship between B7H4 expression and overall survival in patients with solid tumors. Egger test  $p$  value= 0.6185, Begg's test  $p$  value=0.9104 ( $p>0.05$ - Bias was not detected in Egger's and Begg;s tests)

**Figure S2.**

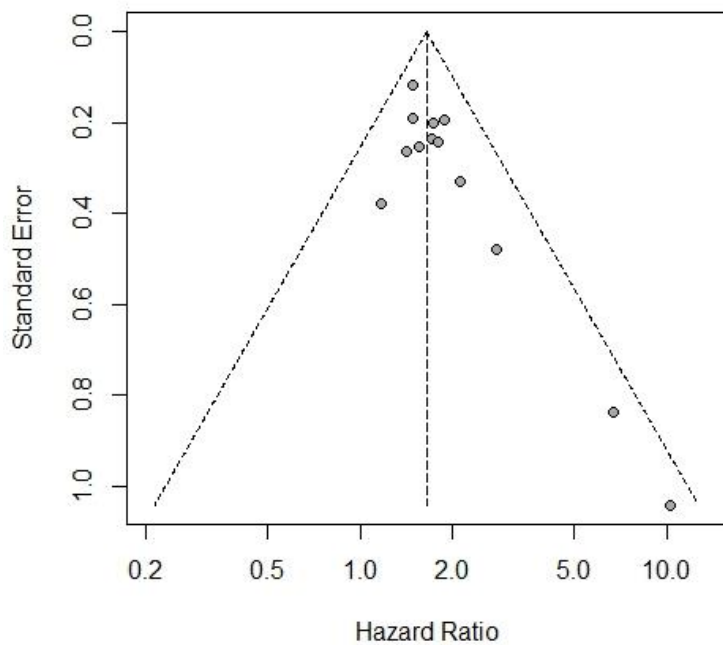

**Figure S2.** Begg's funnel plots for assessing potential publication bias on the relationship between B7H4 expression and overall survival in patients with gastrointestinal malignancies. Egger test  $p$  value= 0.0059, Begg's test  $p$  value=0.0381 ( $p<0.05$ - Bias was detected in Egger's and Begg;s tests)

**Figure S3**

A.

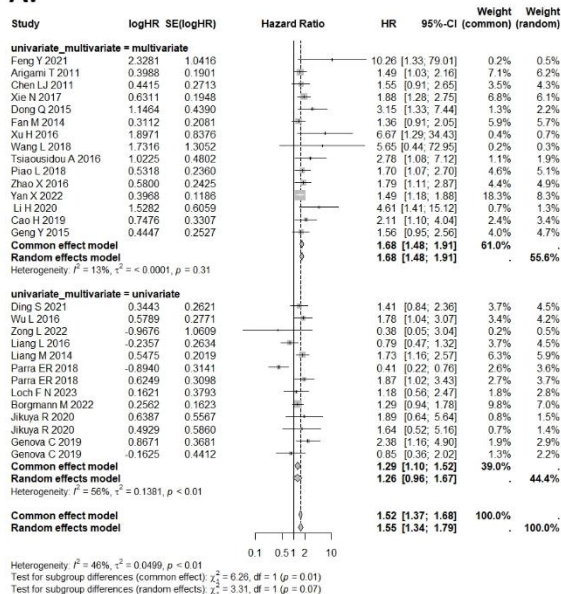

B.

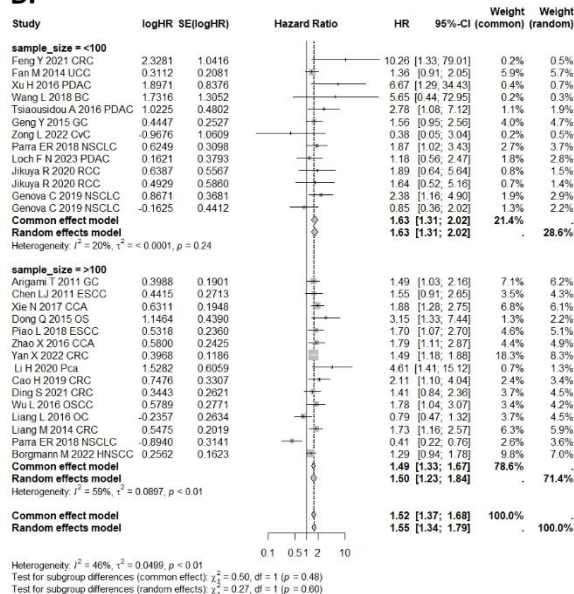

C.

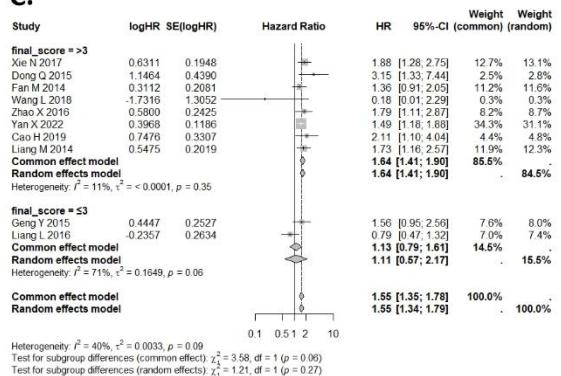

D.

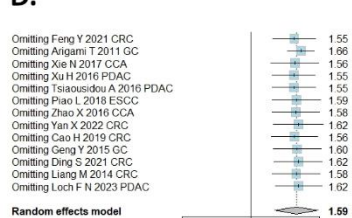

**Figure S3.** Subgroup analysis for the relationship between B7H4 and overall survival **(A)** Grouped by different methods to estimate HR. **(B)** Grouped by sample size **(C)** Grouped by final score in IHC assessment. **(D)** One-leave meta-analysis for investigating the effects of particular studies on the association between B7H4 expression and overall survival in gastrointestinal cancers.

**Table S5.**

| Terms | Definition                                                                                                                                        |
|-------|---------------------------------------------------------------------------------------------------------------------------------------------------|
| OS    | Overall survival (OS) was defined as the duration between time 0 to the day when patients succumbed, underwent truncation or the final follow up. |
| DSS   | Disease-Specific Survival (DSS) refers to deaths caused specifically by a particular disease.                                                     |
| DFS   | Disease-free survival (DFS) The time from random assignment to cancer recurrence or death from any cause..                                        |
| PFS   | Progression-free survival (PFS), defined as the time from random assignment in a clinical trial to disease progression or death from any cause    |
| RFS   | Relapse-free survival (RFS) The time from treatment of disease to any event, irrespective of cause, except for any second primary cancers         |
